# Supplementary material
Source: PubMed Central journal article supplement (PMC3319382)
Supplement: NIHMS338840-supplement-01.pdf [file NIHMS338840-supplement-01.pdf]

## Supporting Information

### **Photoaffinity Labeling of Ras Converting Enzyme using Peptide Substrates that Incorporate Benzoylphenylalanine (Bpa) Residues: Improved Labeling and Structural Implications**

*Kelly Kyro,<sup>a,b</sup> Surya Manandhar,<sup>c</sup> Daniel Mullen,<sup>a,b</sup> Walter K. Schmidt<sup>c</sup> and Mark D. Distefano<sup>a,b\*</sup>*

*<sup>a</sup>Department of Chemistry, University of Minnesota, Minneapolis, MN 55455*

*<sup>b</sup>Department of Medicinal Chemistry, University of Minnesota, Minneapolis, MN 55455*

*<sup>c</sup>Department of Biochemistry and Molecular Biology, University of Georgia, Athens, GA 30602*

\*Corresponding author. Tel.: 612-624-0544; fax: 612-626-7541.  
E-mail address: diste001@umn.edu

### Compound Characterization List (6 & 9):

Retention times ( $t_R$ ) are based on analytical RP-HPLC using a linear gradient from 100% H<sub>2</sub>O to 40% H<sub>2</sub>O/60% CH<sub>3</sub>CN over 60 min and a flow rate of 1.0 mL/min. Peptide concentrations were determined by UV spectroscopy:  $\epsilon_{349} = 18,000 \text{ mM}^{-1}\cdot\text{cm}^{-1}$ .

#### Abz-KSKTKC(C10BP)K(Dnp)IM, 6.

Reaction scale: 7.4  $\mu\text{mol}$ , yield: 1.3 mg (10%), purity by RP-HPLC: 92.6%,  $t_R = 57.5 \text{ min.}$ , ESI-MS (m/z):  $[\text{M}+2\text{H}]^{2+}$  calcd for C<sub>82</sub>H<sub>122</sub>N<sub>16</sub>O<sub>19</sub>S<sub>2</sub> 849.4251, found 849.9947;  $[\text{M}+3\text{H}]^{3+}$  calcd for C<sub>82</sub>H<sub>123</sub>N<sub>16</sub>O<sub>19</sub>S<sub>2</sub> 566.6192, found 566.9992.

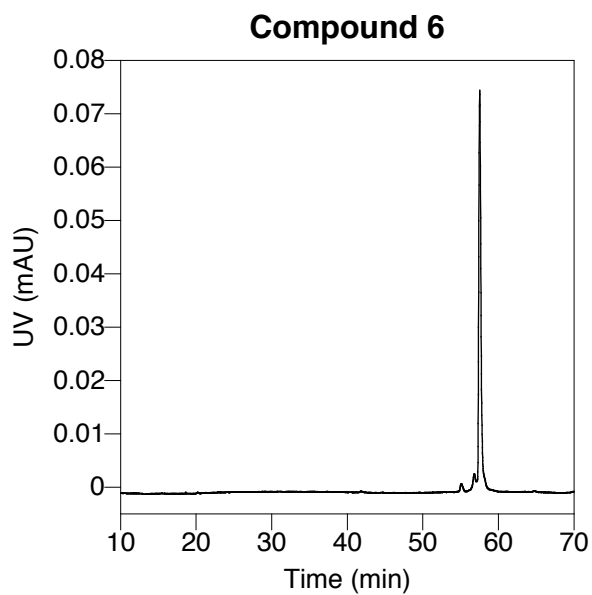

**Biotin-K(Dde)KSKTKC(C10BP)K(Dnp)IM, 9.**

Reaction scale: 5.0  $\mu\text{mol}$ , yield: 5.3 mg (44%), purity by RP-HPLC: 96.2%,  $t_R =$  66 min., ESI-MS (m/z):  $[\text{M}+2\text{Na}]^{2+}$  calcd for  $\text{C}_{115}\text{H}_{179}\text{N}_{21}\text{O}_{28}\text{S}_3\text{Na}_2$  1222.1096, found 1221.8616;  $[\text{M}+2\text{Na}+\text{H}]^{3+}$  calcd for  $\text{C}_{115}\text{H}_{180}\text{N}_{21}\text{O}_{28}\text{S}_3\text{Na}_2$  815.0730, found 814.9139;  $[\text{M}+2\text{Na}+2\text{H}]^{4+}$  calcd for  $\text{C}_{115}\text{H}_{181}\text{N}_{21}\text{O}_{28}\text{S}_3\text{Na}_2$  611.5548, found 611.4392.

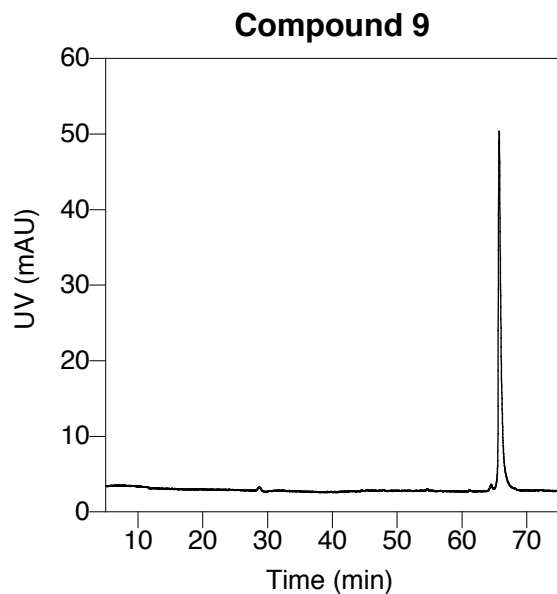

### Compound Characterization List (11-14):

Retention times ( $t_R$ ) are based on analytical RP-HPLC using a linear gradient from 100% H<sub>2</sub>O to 30% H<sub>2</sub>O/70% CH<sub>3</sub>CN over 70 min and a flow rate of 1.0 mL/min. Peptide concentrations of **11-14** were determined by mass.

**Biotin-PEG<sub>3</sub>-Bpa-SKTKC(Fr)VIM, 11.** Purity by RP-HPLC: 91.0%,  $t_R = 64.5$  min.,

ESI-MS (m/z):  $[M+2H]^{2+}$  calcd for C<sub>89</sub>H<sub>146</sub>N<sub>14</sub>O<sub>18</sub>S<sub>3</sub> 897.5045, found 897.6320.

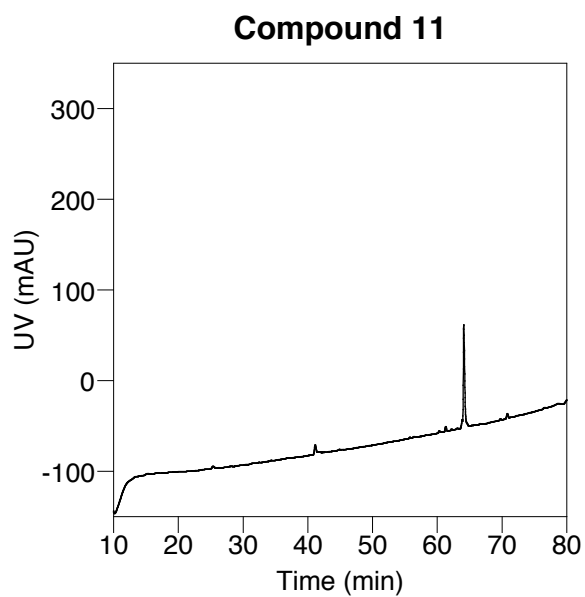

**Biotin-PEG<sub>3</sub>-K-Bpa-KTKC(Fr)VIM, 12.** Purity by RP-HPLC: 81.3%,  $t_R = 61.5$  min.,

ESI-MS (m/z):  $[M+2H]^{2+}$  calcd for C<sub>92</sub>H<sub>153</sub>N<sub>15</sub>O<sub>17</sub>S<sub>3</sub> 918.7622, found 918.6713;

$[M+3H]^{3+}$  calcd for C<sub>92</sub>H<sub>154</sub>N<sub>15</sub>O<sub>17</sub>S<sub>3</sub> 612.8440, found 612.7869.

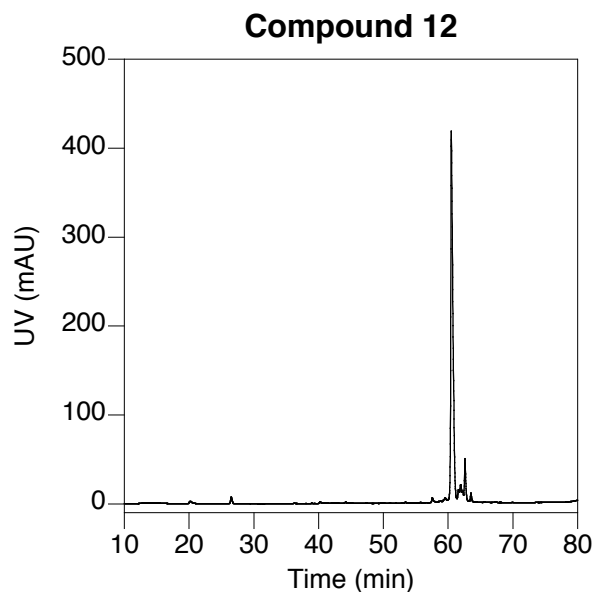

**Biotin-PEG<sub>3</sub>-KS-Bpa-TKC(Fr)VIM, 13.** Purity by RP-HPLC: 74.4%,  $t_R = 64$  min.,

ESI-MS (m/z):  $[M+2H]^{2+}$  calcd for C<sub>89</sub>H<sub>146</sub>N<sub>14</sub>O<sub>18</sub>S<sub>3</sub> 897.5045, found 897.6381.

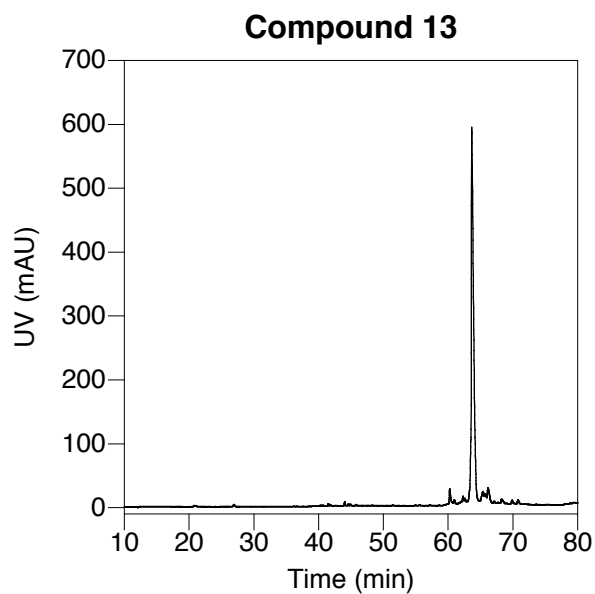

**Biotin-PEG<sub>3</sub>-KSK-Bpa-KC(Fr)VIM, 14.** Purity by RP-HPLC: 91.4%,  $t_R = 64$  min.,

ESI-MS (m/z):  $[M+2H]^{2+}$  calcd for C<sub>91</sub>H<sub>151</sub>N<sub>15</sub>O<sub>17</sub>S<sub>3</sub> 911.0282, found 911.6836;

$[M+3H]^{3+}$  calcd for C<sub>91</sub>H<sub>152</sub>N<sub>15</sub>O<sub>17</sub>S<sub>3</sub> 608.1682, found 608.1268.

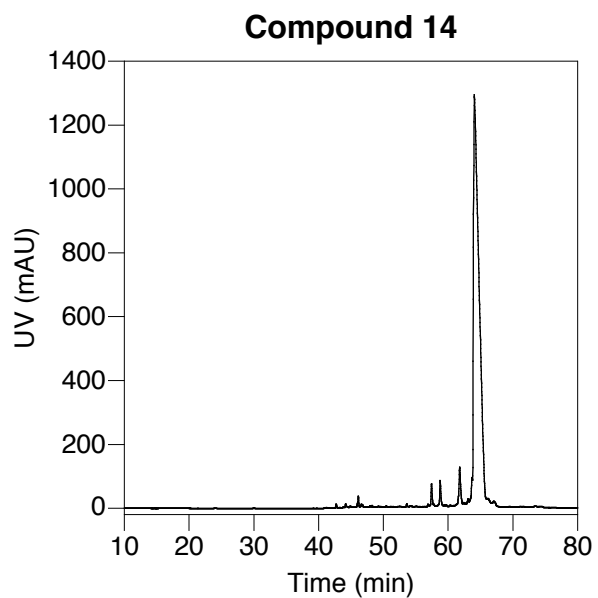

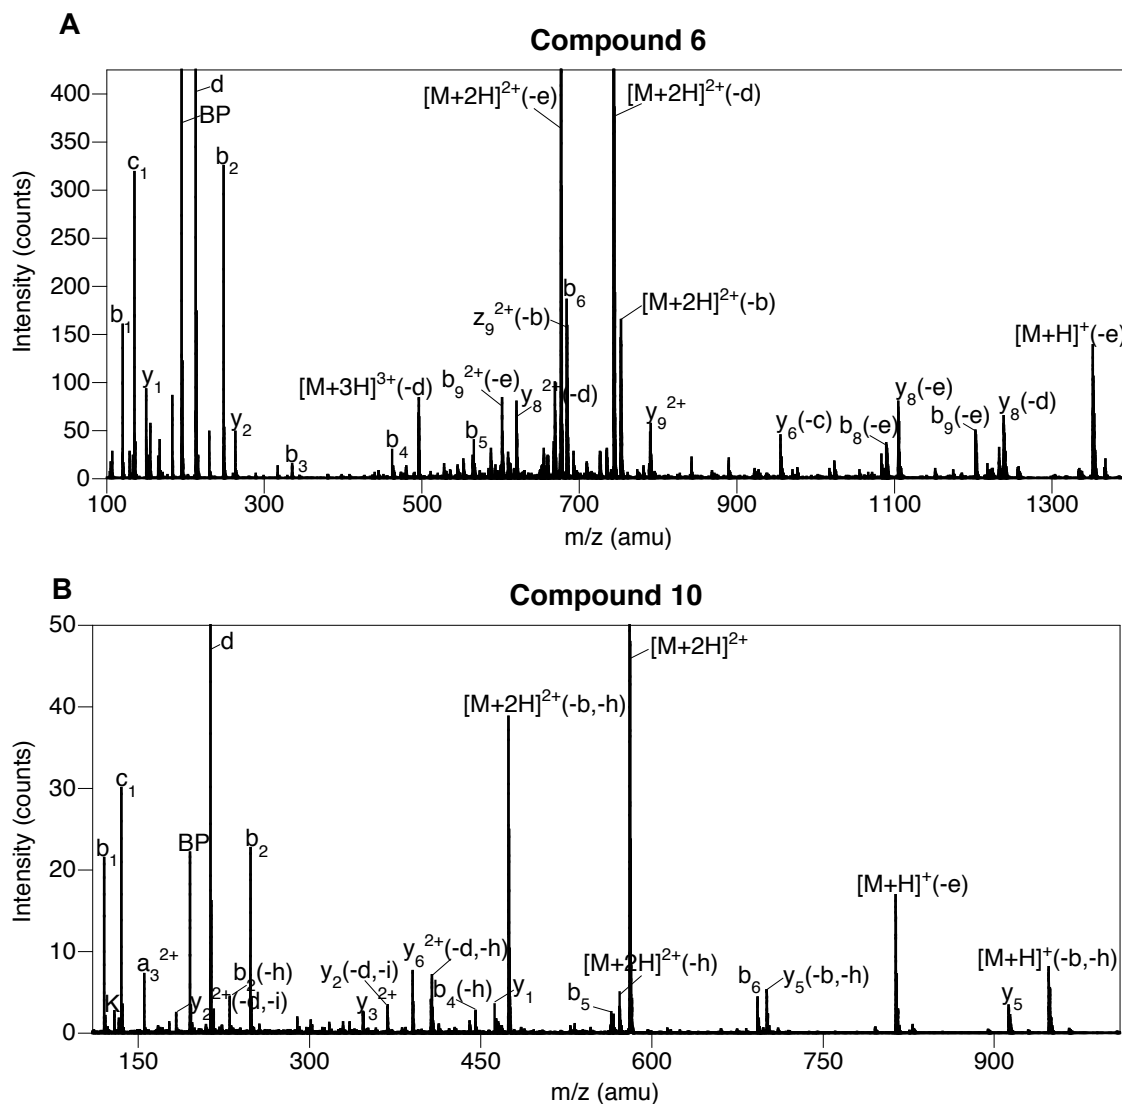

**Figure 1.** ESI-MS-MS of full unprocessed substrate **6** and the Rce1p-catalyzed proteolysis product **10**. (A) Benzophenone-modified substrate **6**. (B) Benzophenone-modified proteolysis product **10**. (K, lysine fragment; BP, benzophenone fragment,  $(C_{14}H_{11}O^+)$ ; -b, loss of benzophenone fragment; -c, loss of C<sub>5</sub>-prenyl benzophenone,  $(C_{19}H_{20}O_2)$ ; d, benzophenone-H<sub>2</sub>O,  $(C_{14}H_{13}O_2)$ ; -d, loss of benzophenone-H<sub>2</sub>O; -e, loss of C<sub>10</sub>-prenyl benzophenone,  $(C_{24}H_{28}O_2)$ ; -h, loss of H<sub>2</sub>O; -i, loss of NH<sub>3</sub>).

**Table 1**

Summary of ESI-MS-MS for unprocessed substrate **6** and the Rce1p-catalyzed proteolysis product **10** (K, lysine fragment; BP, benzophenone fragment, (3-benzoylphenyl)methylium (C<sub>14</sub>H<sub>11</sub>O<sup>+</sup>); -b, loss of benzophenone fragment; -c, loss of (*E*)-(3-(((2-methylbut-2-en-1-yl)oxy)methyl)phenyl)(phenyl)methanone (C<sub>19</sub>H<sub>20</sub>O<sub>2</sub>); d, benzophenone-H<sub>2</sub>O, (3-(hydroxymethyl)phenyl)(phenyl)methanone (C<sub>14</sub>H<sub>13</sub>O<sub>2</sub>); -d, loss of benzophenone-H<sub>2</sub>O; -e, loss of (3-(((2*E*,6*E*)-2,6-dimethylocta-2,6-dien-1-yl)oxy)methyl)phenyl)(phenyl)methanone (C<sub>24</sub>H<sub>28</sub>O<sub>2</sub>); -h, loss of H<sub>2</sub>O; -i, loss of NH<sub>3</sub>).

| Peptide<br>Ion                        | <b>6</b> |         | <b>10</b> |        |
|---------------------------------------|----------|---------|-----------|--------|
|                                       | Calc.    | Obs.    | Calc.     | Obs.   |
| [M+H] <sup>+</sup> (-b, -h)           |          |         | 947.54    | 947.67 |
| [M+H] <sup>+</sup> (-e)               | 1351.65  | 1351.66 | 813.43    | 813.58 |
| [M+2H] <sup>2+</sup>                  |          |         | 580.31    | 580.39 |
| [M+2H] <sup>2+</sup> (-h)             |          |         | 571.31    | 571.39 |
| [M+2H] <sup>2+</sup> (-b)             | 752.39   | 752.40  |           |        |
| [M+2H] <sup>2+</sup> (-d)             | 743.88   | 743.38  |           |        |
| [M+2H] <sup>2+</sup> (-e)             | 676.33   | 676.33  |           |        |
| [M+2H] <sup>2+</sup> (-b, -h)         |          |         | 474.27    | 474.35 |
| [M+3H] <sup>3+</sup> (-d)             | 496.26   | 496.26  |           |        |
| z <sub>9</sub> <sup>2+</sup> (-b)     | 684.86   | 684.87  |           |        |
| y <sub>5</sub>                        |          |         | 912.49    | 912.66 |
| y <sub>8</sub> (-d)                   | 1238.64  | 1238.64 |           |        |
| y <sub>8</sub> (-e)                   | 1104.52  | 1104.54 |           |        |
| y <sub>6</sub> (-c)                   | 956.44   | 956.47  |           |        |
| y <sub>9</sub> <sup>2+</sup>          | 789.91   | 790.41  |           |        |
| y <sub>5</sub> (-b, -h)               |          |         | 700.41    | 700.53 |
| y <sub>8</sub> <sup>2+</sup> (-d)     | 620.32   | 619.82  |           |        |
| y <sub>2</sub>                        | 263.14   | 263.15  |           |        |
| y <sub>1</sub>                        | 150.06   | 150.06  | 468.22    | 468.12 |
| y <sub>6</sub> <sup>2+</sup> (-d, -h) |          |         | 406.25    | 406.29 |
| y <sub>2</sub> (-d, -i)               |          |         | 368.21    | 368.30 |
| y <sub>3</sub> <sup>2+</sup>          |          |         | 349.19    | 349.47 |
| y <sub>2</sub> <sup>2+</sup> (-d, -i) |          |         | 184.61    | 184.12 |
| c <sub>1</sub>                        | 135.06   | 135.12  | 135.06    | 135.14 |
| b <sub>9</sub> (-e)                   | 1202.60  | 1202.62 |           |        |
| b <sub>8</sub> (-e)                   | 1089.51  | 1089.53 |           |        |
| b <sub>6</sub>                        | 692.41   | 692.43  | 692.41    | 692.79 |
| b <sub>9</sub> <sup>2+</sup> (-e)     | 601.80   | 601.80  |           |        |
| b <sub>5</sub>                        | 564.31   | 564.32  | 564.31    | 564.21 |
| b <sub>4</sub>                        | 463.27   | 463.29  |           |        |
| b <sub>4</sub> (-h)                   |          |         | 445.26    | 445.36 |
| b <sub>3</sub>                        | 335.17   | 335.18  |           |        |
| b <sub>2</sub>                        | 248.14   | 248.14  | 248.14    | 248.18 |
| b <sub>2</sub> (-h)                   |          |         | 230.15    | 230.18 |
| b <sub>1</sub>                        | 120.10   | 120.05  | 120.10    | 120.07 |
| a <sub>3</sub> <sup>2+</sup>          |          |         | 154.10    | 154.11 |
| d                                     | 213.09   | 213.10  | 213.09    | 213.14 |
| BP                                    | 195.12   | 195.08  | 195.12    | 195.12 |
| K                                     |          |         | 129.10    | 129.13 |



ESI-MS-MS Spectra of Compounds 11-13.

**Compound 11**

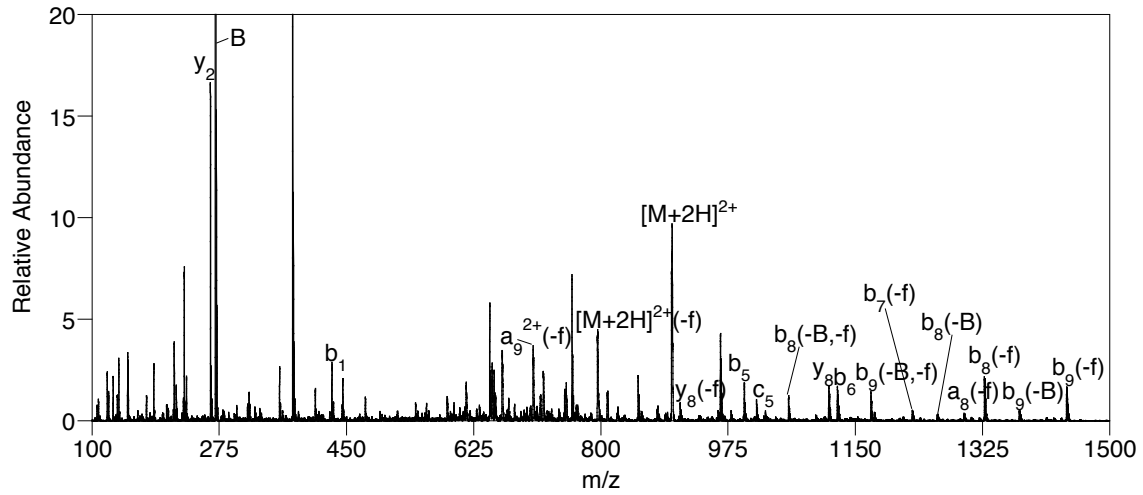

**Compound 12**

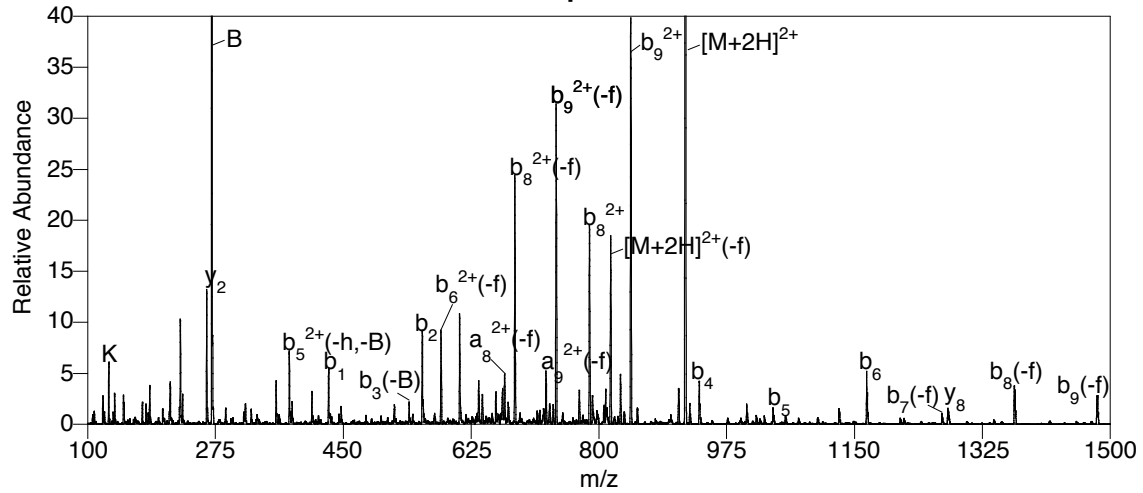

### Compound 13

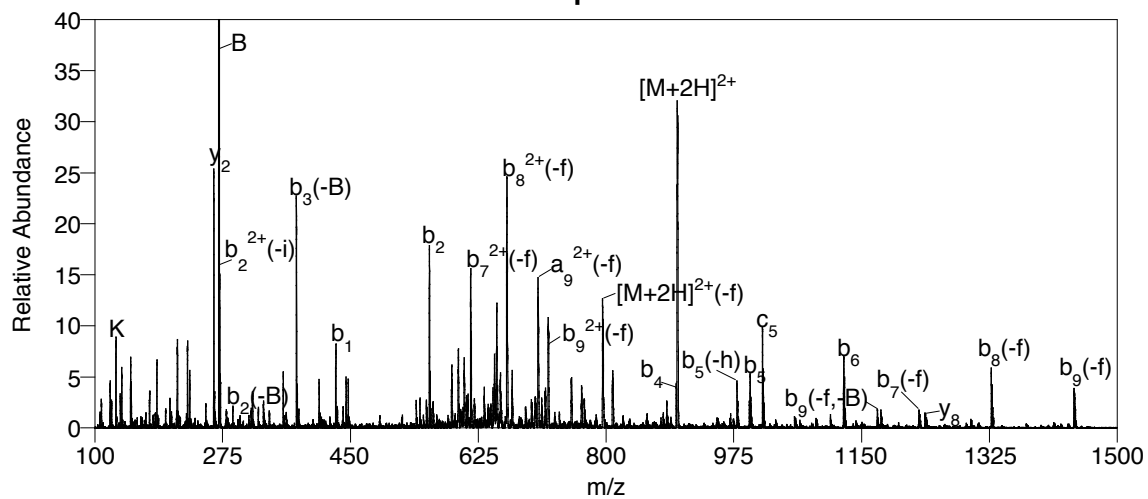

**Table 2**

Summary of ESI-MS-MS for unprocessed Bpa-containing peptides, **11-14** (-f, loss of farnesyl (C<sub>15</sub>H<sub>25</sub>); -h, loss of H<sub>2</sub>O; B, biotin fragment, 2-(5-((3a*R*,4*S*,6a*S*)-2-oxohexahydro-1*H*-thieno[3,4-*d*]imidazol-4-yl)pentanamido)ethan-1-ylum (C<sub>12</sub>H<sub>20</sub>N<sub>3</sub>O<sub>2</sub>S<sup>+</sup>), -B, loss of biotin fragment; -i, loss of NH<sub>3</sub>; K, lysine fragment).

| Peptide<br>Ion                       | 11      |         | 12      |         | 13      |         | 14      |         |
|--------------------------------------|---------|---------|---------|---------|---------|---------|---------|---------|
|                                      | Calc.   | Obs.    | Calc.   | Obs.    | Calc.   | Obs.    | Calc.   | Obs.    |
| [M+2H] <sup>2+</sup>                 | 897.50  | 897.66  | 918.04  | 918.25  | 897.50  | 897.56  |         |         |
| [M+2H] <sup>2+</sup> (-f)            | 795.41  | 795.45  | 815.94  | 816.13  | 795.41  | 795.44  | 808.93  | 808.93  |
| [M+3H] <sup>3+</sup>                 |         |         |         |         |         |         | 607.68  | 607.83  |
| [M+3H] <sup>3+</sup> (-f)            |         |         |         |         |         |         | 539.62  | 539.64  |
| y <sub>8</sub>                       | 1113.68 | 1113.69 | 1277.74 | 1277.79 | 1236.68 | 1236.72 |         |         |
| y <sub>8</sub> (-h)                  | 1095.66 | 1095.72 |         |         |         |         |         |         |
| y <sub>8</sub> (-B,-f)               |         |         |         |         | 1032.48 | 1032.44 |         |         |
| y <sub>8</sub> (-f)                  | 909.48  | 909.45  |         |         |         |         | 1059.54 | 1059.51 |
| y <sub>2</sub>                       | 263.14  | 262.98  | 263.14  | 263.07  | 263.14  | 263.12  | 263.14  | 263.09  |
| y <sub>1</sub>                       |         |         |         |         |         |         | 150.06  | 150.03  |
| c <sub>5</sub>                       | 1014.53 | 1014.44 |         |         | 1014.53 | 1014.48 |         |         |
| b <sub>9</sub> (-f)                  | 1440.76 | 1440.80 | 1481.82 | 1482.02 | 1440.76 | 1440.80 |         |         |
| b <sub>9</sub> (-B)                  | 1375.83 | 1376.01 |         |         |         |         |         |         |
| b <sub>8</sub> (-f)                  | 1327.68 | 1327.71 | 1368.74 | 1368.85 | 1327.68 | 1327.72 | 1354.72 | 1354.81 |
| b <sub>8</sub> (-B)                  | 1262.74 | 1262.82 |         |         |         |         |         |         |
| b <sub>7</sub> (-f)                  | 1228.61 | 1228.68 | 1269.67 | 1269.67 | 1228.61 | 1228.60 | 1255.66 | 1255.67 |
| b <sub>9</sub> (-B,-f)               | 1171.64 | 1171.62 |         |         | 1171.64 | 1171.64 | 1198.69 | 1198.63 |
| b <sub>6</sub>                       | 1125.60 | 1125.57 | 1166.66 | 1166.57 | 1125.60 | 1125.60 | 1152.65 | 1152.63 |
| b <sub>6</sub> (-h)                  |         |         |         |         | 1107.59 | 1107.52 |         |         |
| b <sub>6</sub> (-B,-f)               | 1058.56 | 1058.52 |         |         | 1058.56 | 1058.56 |         |         |
| b <sub>5</sub>                       | 997.50  | 997.47  | 1038.56 | 1038.42 | 997.50  | 997.48  | 1024.55 | 1024.64 |
| b <sub>5</sub> (-h)                  |         |         |         |         | 979.50  | 979.48  |         |         |
| b <sub>4</sub>                       |         |         | 937.52  | 937.50  | 896.46  | 896.44  |         |         |
| b <sub>9</sub> <sup>2+</sup>         |         |         | 843.51  | 843.64  |         |         |         |         |
| b <sub>3</sub>                       |         |         |         |         |         |         |         |         |
| b <sub>9</sub> <sup>2+</sup>         |         |         |         |         |         |         | 836.50  | 836.50  |
| b <sub>8</sub> <sup>2+</sup>         |         |         | 786.96  | 787.09  |         |         |         |         |
| b <sub>9</sub> <sup>2+</sup> (-f)    |         |         | 741.42  | 741.52  | 720.88  | 720.88  | 734.40  | 734.36  |
| b <sub>8</sub> <sup>2+</sup> (-f)    |         |         | 684.87  | 684.97  | 664.34  | 664.36  | 667.86  | 667.84  |
| b <sub>7</sub> <sup>2+</sup> (-f)    |         |         |         |         | 614.80  | 614.84  |         |         |
| b <sub>6</sub> <sup>2+</sup> (-f)    |         |         | 583.84  | 583.90  |         |         |         |         |
| b <sub>6</sub> <sup>2+</sup>         |         |         |         |         |         |         | 576.82  | 576.82  |
| b <sub>2</sub>                       |         |         | 558.33  | 558.22  | 558.33  | 558.28  | 558.33  | 558.23  |
| b <sub>9</sub> <sup>3+</sup> (-f)    |         |         |         |         |         |         | 489.94  | 490.00  |
| b <sub>1</sub>                       | 430.20  | 430.14  | 430.20  | 430.13  | 430.20  | 430.16  | 430.20  | 430.14  |
| b <sub>3</sub> (-B)                  |         |         | 540.30  | 540.23  | 376.24  | 376.24  | 376.24  | 376.08  |
| b <sub>5</sub> <sup>2+</sup> (-B,-h) |         |         | 376.22  | 376.10  |         |         |         |         |
| b <sub>2</sub> (-B)                  |         |         |         |         | 289.21  | 289.16  |         |         |
| b <sub>2</sub> <sup>2+</sup> (-i)    |         |         |         |         | 271.16  | 271.12  |         |         |
| a <sub>8</sub> (-f)                  | 1299.68 | 1299.69 |         |         |         |         |         |         |
| a <sub>9</sub> <sup>2+</sup> (-f)    | 706.88  | 706.92  | 727.42  | 727.59  | 706.88  | 706.92  | 720.41  | 720.38  |
| a <sub>8</sub> <sup>2+</sup> (-f)    |         |         | 670.88  | 670.90  |         |         | 663.86  | 663.87  |
| B                                    | 270.13  | 270.09  | 270.13  | 270.14  | 270.13  | 270.12  | 270.13  | 270.04  |
| K                                    |         |         | 129.10  | 129.11  | 129.10  | 129.08  |         |         |

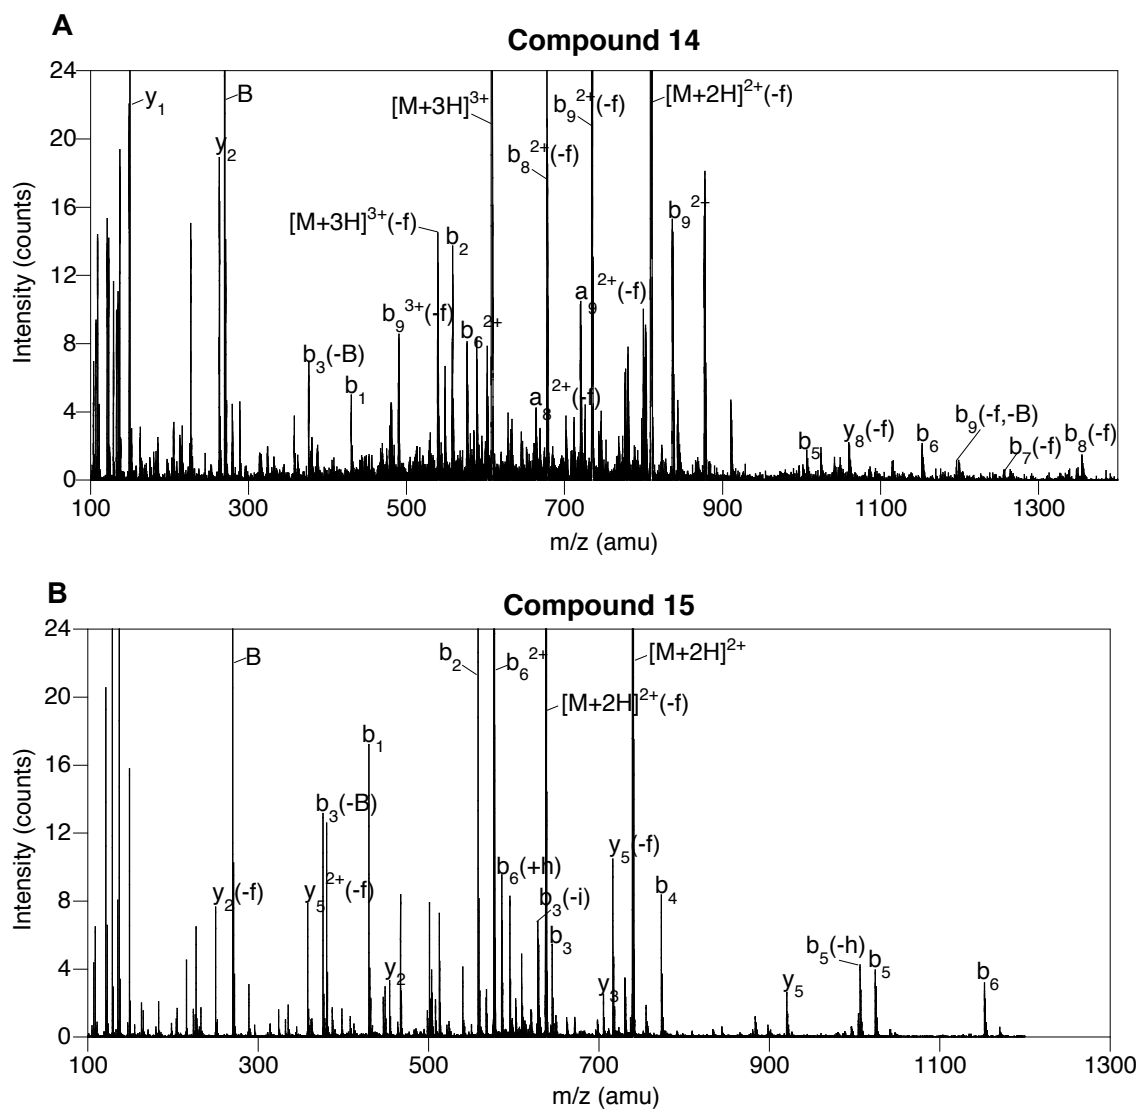

**Figure 2.** ESI-MS-MS of full unprocessed Substrate **14** and the Rce1p-catalyzed proteolysis product **15**. (A) BPA-containing substrate **14**. (B) Bpa-containing proteolysis product **15**. -f, loss of farnesyl ( $C_{15}H_{25}$ ); -h, loss of  $H_2O$ ; +h, gain of  $H_2O$ ; B, biotin fragment, ( $C_{12}H_{20}N_3O_2S^+$ ), -B, loss of biotin fragment; -i, loss of  $NH_3$ .

**Table 3**

Summary of ESI-MS-MS for unprocessed substrate **14** and the Rce1p-catalyzed proteolysis product **15** (-f, loss of farnesyl (C<sub>15</sub>H<sub>25</sub>); -h, loss of H<sub>2</sub>O; +h, gain of H<sub>2</sub>O; B, biotin fragment, 2-(5-((3*aR*,4*S*,6*aS*)-2-oxohexahydro-1*H*-thieno[3,4-*d*]imidazol-4-yl)pentanamido)ethan-1-ylum (C<sub>12</sub>H<sub>20</sub>N<sub>3</sub>O<sub>2</sub>S<sup>+</sup>), -B, loss of biotin fragment; -i, loss of NH<sub>3</sub>).

| Peptide                           | 14      |         | 15      |         |
|-----------------------------------|---------|---------|---------|---------|
|                                   | Calc.   | Obs.    | Calc.   | Obs.    |
| Ion                               |         |         |         |         |
| [M+2H] <sup>2+</sup>              |         |         | 739.43  | 739.42  |
| [M+2H] <sup>2+</sup> (-f)         | 808.93  | 808.93  | 637.34  | 637.32  |
| [M+3H] <sup>3+</sup>              | 607.68  | 607.83  |         |         |
| [M+3H] <sup>3+</sup> (-f)         | 539.62  | 539.64  |         |         |
| y <sub>8</sub> (-f)               | 1059.54 | 1059.51 |         |         |
| y <sub>5</sub>                    |         |         | 920.53  | 920.52  |
| y <sub>5</sub> (-f)               |         |         | 716.34  | 716.34  |
| y <sub>3</sub>                    |         |         | 705.40  | 705.39  |
| y <sub>2</sub>                    | 263.14  | 263.09  | 454.31  | 454.31  |
| y <sub>5</sub> <sup>2+</sup> (-f) |         |         | 358.67  | 358.74  |
| y <sub>2</sub> (-f)               |         |         | 250.12  | 250.12  |
| y <sub>1</sub>                    | 150.06  | 150.03  |         |         |
| b <sub>8</sub> (-f)               | 1354.72 | 1354.81 |         |         |
| b <sub>7</sub> (-f)               | 1255.66 | 1255.67 |         |         |
| b <sub>9</sub> (-B,-f)            | 1198.69 | 1198.63 |         |         |
| b <sub>6</sub>                    | 1152.65 | 1152.63 | 1152.64 | 1152.61 |
| b <sub>5</sub>                    | 1024.55 | 1024.64 | 1024.55 | 1024.50 |
| b <sub>5</sub> (-h)               |         |         | 1006.54 | 1006.51 |
| b <sub>4</sub>                    |         |         | 773.46  | 773.42  |
| b <sub>3</sub>                    |         |         | 645.36  | 645.33  |
| b <sub>9</sub> <sup>2+</sup>      | 836.50  | 836.50  |         |         |
| b <sub>9</sub> <sup>2+</sup> (-f) | 734.40  | 734.36  |         |         |
| b <sub>8</sub> <sup>2+</sup> (-f) | 667.86  | 667.84  |         |         |
| b <sub>3</sub> (-i)               |         |         | 628.34  | 628.32  |
| b <sub>6</sub> <sup>2+</sup> (+h) |         |         | 585.83  | 585.82  |
| b <sub>6</sub> <sup>2+</sup>      | 576.82  | 576.82  | 576.82  | 576.81  |
| b <sub>2</sub>                    | 558.33  | 558.23  | 558.33  | 558.30  |
| b <sub>9</sub> <sup>3+</sup> (-f) | 489.94  | 490.00  |         |         |
| b <sub>1</sub>                    | 430.20  | 430.14  | 430.20  | 430.20  |
| b <sub>3</sub> (-B)               | 376.24  | 376.08  | 376.24  | 376.20  |
| a <sub>9</sub> <sup>2+</sup> (-f) | 720.41  | 720.38  |         |         |
| a <sub>8</sub> <sup>2+</sup> (-f) | 663.86  | 663.87  |         |         |
| B                                 | 270.13  | 270.04  | 270.13  | 270.13  |

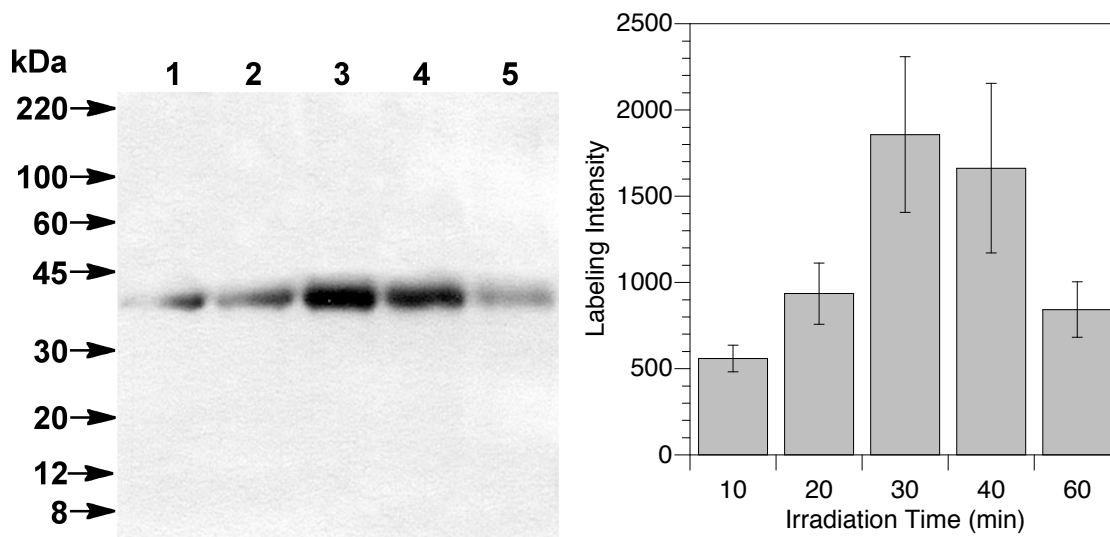

**Figure 3.** Western blot analysis (left) and densitometric quantification (right) of time course photolabeling of Rce1p using probe **14** detected with anti-HA following SPD and SDS-PAGE separation. Lanes 1-5 correspond to Rce1p-containing membranes (*RCE1-HA*) photolyzed with probe **14** (15  $\mu$ M) for 10, 20, 30, 40, and 60 min, respectively. Columns represent densitometric data obtained from three replicate experiments using probe **14** for the indicated amounts of time.
